# Supplementary material for: Child and adolescent self-report symptom measurement in pediatric oncology research: a systematic literature review
Source: Springer Nature journal article supplement (doi:10.1007/s11136-017-1692-4), 2017-09-06
Supplement: MOESM1 [file 15020532]

Appendix A. Search Terms

MEDLINE via PubMed

Date searched: 8/12/15

| Search | Query | Results |
| --- | --- | --- |
| 1 | "Neoplasms"[Mesh] OR neoplasms[tw] OR neoplasm[tw] OR cancer[tw] OR cancers[tw] OR oncology[tw] OR malignan*[tw] | 3,111,831 |
| 2 | Child[Mesh] OR child[tw] OR children[tw] OR pediatric[tw] OR pediatrics[tw] OR juvenile[tw] OR adolescent OR Adolescents[tw] OR Adolescence[tw] OR Teens[tw] OR Teen[tw] OR Teenagers[tw] OR Teenager[tw] OR Youth[tw] OR Youths[tw] | 2,899,325 |
| 3 | self report[tw] OR self reported[tw] OR self reporting[tw] OR self rate[tw] OR self rated[tw] OR self rating[tw] OR patient report[tw] OR patient reported[tw] OR patient reporting[tw] OR patient rate[tw] OR patient rated[tw] OR patient rating[tw] | 121,005 |
| 4 | Questionnaires[Mesh] OR questionnaires[tw] OR questionnaire[tw] OR measure[tw] OR measures[tw] OR measurement[tw] OR measurements[tw] OR survey[tw] OR surveys[tw] OR instrument[tw] OR instruments[tw] OR scale[tw] OR scales[tw] OR index[tw] OR indices[tw] OR indicator[tw] OR indicators[tw] | 3,483,319 |
| 5 | (#1 AND #2 AND #3 AND #4) | 835 |
|  | (#1 AND #2 AND #3 AND #4); Filters: English | 825 |

Total number after internal duplicates removed: 825

Total number after external duplicates removed: 825

EMBASE via embase.com

Date searched: 8/12/15

| Search | Query | Results |
| --- | --- | --- |
| #1 | (‘neoplasm’/exp OR (neoplasm OR neoplasms OR cancer OR cancers OR oncology):ab,ti) OR malignan* | 3,959,294 |
| #2 | (‘juvenile’/exp OR ‘adolescent’/exp OR ‘child’/exp OR (juvenile OR juveniles OR adolescent OR adolescents OR adolescence OR child OR children OR teen OR teens OR teenager OR teenagers OR youth OR youths OR pediatric OR pediatrics):ab,ti) | 3,322,758 |
| #3 | (‘self report’/exp) OR ((child* OR self OR patient*) NEAR/3 (report* OR rated OR rating OR score*)):ab,ti | 457,113 |
| #4 | (‘questionnaire’/exp OR (questionnaire OR questionnaires OR measure OR measures OR measurement OR survey OR surveys OR instrument OR instruments OR instrumentation OR scale OR scales OR index OR indices OR indicator OR indicators):ab,ti) | 3,476,078 |
| #5 | #1 AND #2 AND #3 AND #4 AND | 3,947 |
| #6 | #1 AND #2 AND #3 AND #4 AND [english]/lim | 3,813 |

Total number after internal duplicates removed: 3,786

Total number after external duplicates removed: 3,135

PsycINFO via EBSCO

Date searched: 8/12/15

| Search | Query | Results |
| --- | --- | --- |
| S1 | Neoplasms OR cancer OR oncology OR malignan* | 72,438 |
| S2 | juvenile OR juveniles OR adolescent OR adolescents OR adolescence OR child OR children OR teen OR teens OR teenager OR teenagers OR youth OR youths OR pediatric OR pediatrics | 796,966 |
| S3 | (child* OR self OR patient*) N3 (report* OR rated OR rating OR score*) | 478,568 |
| S4 | questionnaire OR questionnaires OR measure OR measures OR measurement OR survey OR surveys OR instrument OR instruments OR instrumentation OR scale OR scales OR index OR indices OR indicator OR indicators | 1,059,086 |
| S5 | S1 AND S2 AND S3 AND S4 | 1,954 |
| S6 | S1 AND S2 AND S3 AND S4 ; Limiters – English | 1,911 |

Total number after internal duplicates removed: 1,909

Total number after external duplicates removed: 1,503

CINAHL Plus with Full Text

Date searched: 8/12/15

| Search | Query | Results |
| --- | --- | --- |
| S1 | Neoplasms OR cancer OR oncology OR malignan* | 346,397 |
| S2 | juvenile OR juveniles OR adolescent OR adolescents OR adolescence OR child OR children OR teen OR teens OR teenager OR teenagers OR youth OR youths OR pediatric OR pediatrics | 660,397 |
| S3 | (child* OR self OR patient*) N3 (report* OR rated OR rating OR score*) | 113,460 |
| S4 | questionnaire OR questionnaires OR measure OR measures OR measurement OR survey OR surveys OR instrument OR instruments OR instrumentation OR scale OR scales OR index OR indices OR indicator OR indicators | 815,457 |
| S5 | S1 AND S2 AND S3 AND S4 | 1,246 |
| S6 | S1 AND S2 AND S3 AND S4 ; Limiters – English | 1,230 |

Total number after internal duplicates removed: 1,230

Total number after external duplicates removed: 572
